# Supplementary material for: Transcriptome Sequencing Reveal That Rno-Rsf1_0012 Participates in Levodopa-Induced Dyskinesia in Parkinson’s Disease Rats via Binding to Rno-mir-298-5p
Source: MDPI journal article supplement (doi:10.3390/brainsci12091206), 2022-09-07
Supplement: s1 [file s1]

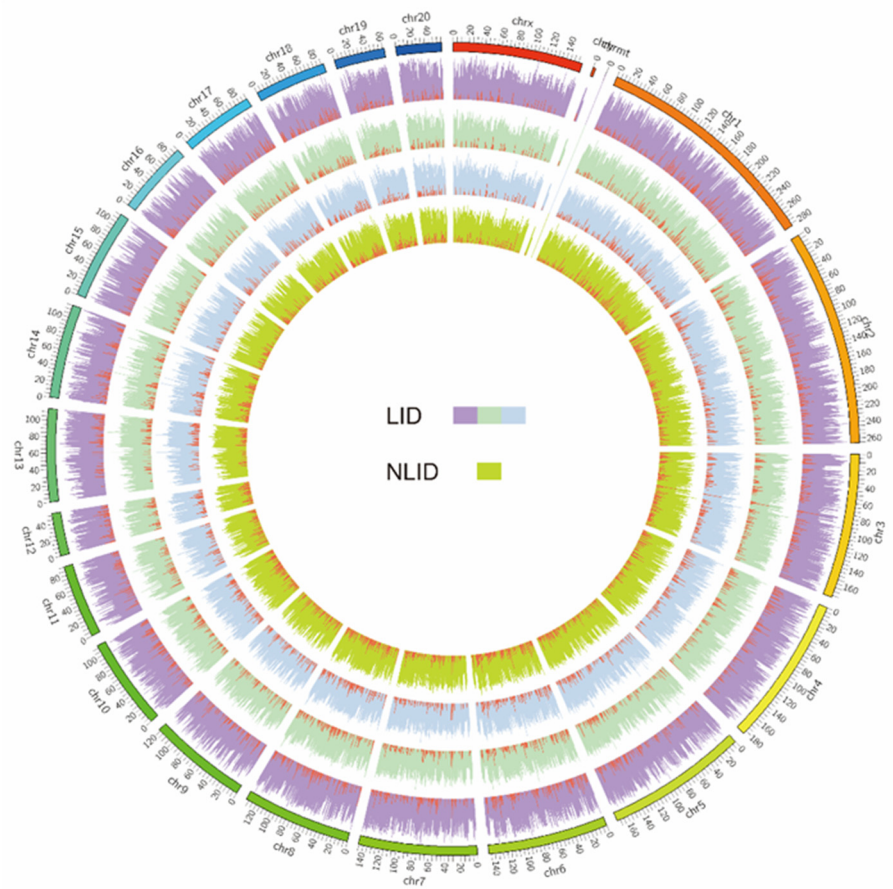

**Figure S1.** Genome distribution map of four samples.

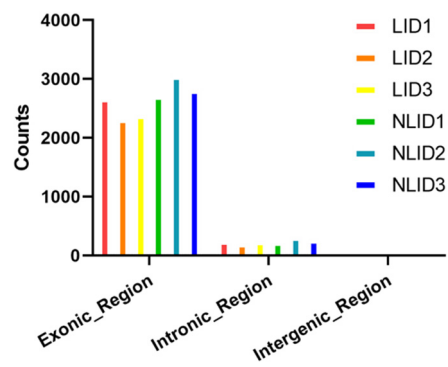

**Figure S2.** The classification of predicted circRNAs.

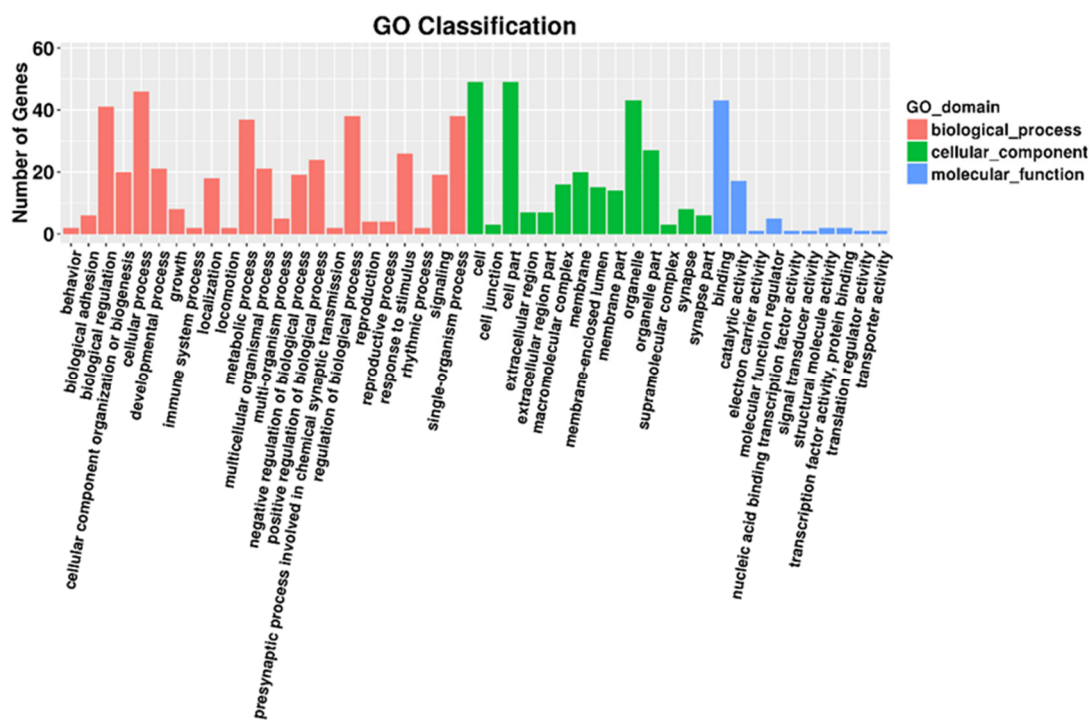

Figure S3. Go functional classification of the host genes of DEcircRNAs

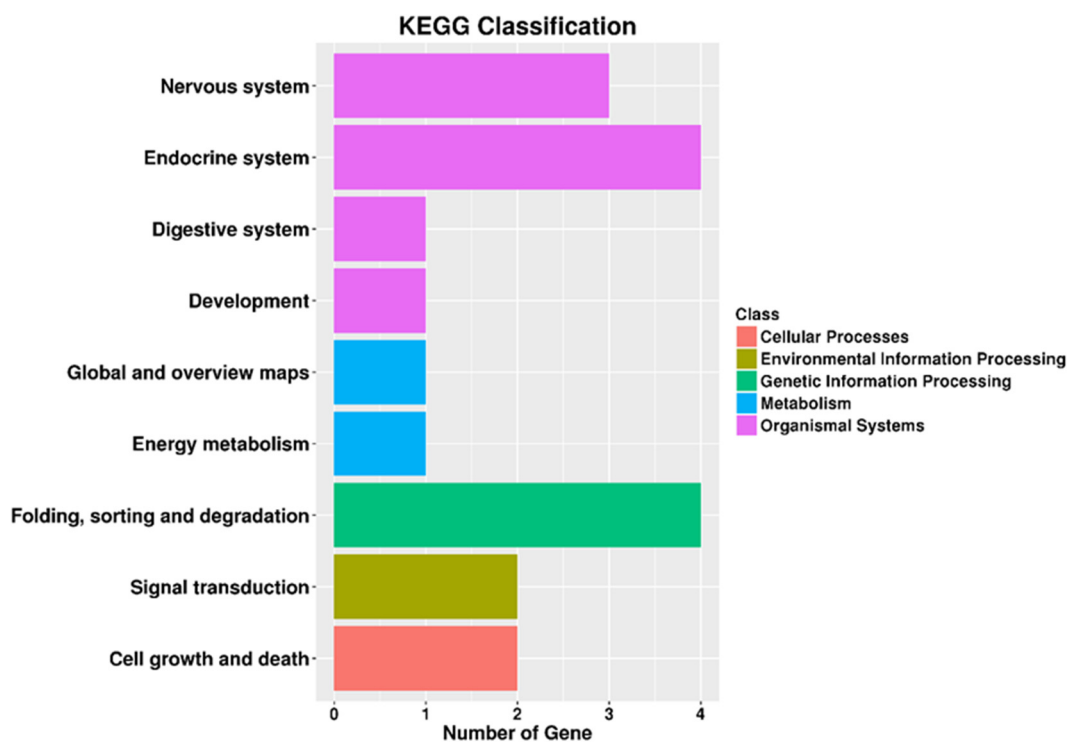

Figure S4. KEGG classification of the host genes of DEcircRNAs
